# Supplementary material
Source: PubMed Central journal article supplement (PMC3012563)
Supplement: supp_110.084814_biolreprod.110.084814-1.pdf [file supp_110.084814_biolreprod.110.084814-1.pdf]

**Supplemental Table S1.** Genes exhibiting  $\geq 2$  fold increase in expression between 12-14.5 dpc in controls (at p-value of 0.05; Bonferroni corrected).

| Gene Symbol                           | p-value  | Fold-Change | Meiosis* | Testis or Ovary** | RefSeq             |
|---------------------------------------|----------|-------------|----------|-------------------|--------------------|
| <i>Gm1564</i>                         | 6.08E-07 | 51.8        |          |                   | NM_001127576       |
| <i>Sycp1</i>                          | 1.22E-06 | 27.7        | ✓        |                   | NM_011516          |
| <i>Stra8</i>                          | 1.90E-07 | 22.5        | ✓        |                   | NM_009292          |
| <i>Smc1b</i>                          | 2.18E-07 | 16.6        | ✓        |                   | NM_080470          |
| <i>Sycp3</i>                          | 2.76E-09 | 16.2        | ✓        |                   | NM_011517          |
| <i>Xlr4c</i>                          | 2.58E-09 | 13.5        |          |                   | NM_183094          |
| <i>Tex12</i>                          | 9.07E-09 | 13.1        | ✓        |                   | NM_025687          |
| <i>Slc25a31</i>                       | 1.31E-07 | 11.6        |          | ✓                 | NM_178386          |
| <i>Mael</i>                           | 2.96E-08 | 11.6        |          | ✓                 | NM_175296          |
| <i>Hormad1<sup>#</sup></i>            | 1.30E-07 | 11.0        | ✓        |                   | NM_026489          |
| <i>Xlr4b<sup>#</sup></i>              | 2.64E-10 | 10.9        |          |                   | NM_021365          |
| <i>4930528F23Rik</i>                  | 5.27E-10 | 10.8        |          |                   | BC119085           |
| <i>Xlr5b</i>                          | 2.31E-07 | 10.5        |          |                   | NM_001111293       |
| <i>1700013H16Rik</i>                  | 1.77E-09 | 10.0        |          |                   | ENSMUST00000067940 |
| <i>Sycp2</i>                          | 3.43E-07 | 9.2         | ✓        |                   | NM_177191          |
| <i>Stk31</i>                          | 5.86E-08 | 8.5         |          | ✓                 | NM_029916          |
| <i>Xlr5a</i>                          | 5.81E-08 | 8.3         |          |                   | NM_001045539       |
| <i>Tex11</i>                          | 3.84E-07 | 8.2         | ✓        |                   | NM_031384          |
| <i>Hfm1<sup>#</sup></i>               | 1.97E-09 | 8.2         |          | ✓                 | ENSMUST00000117588 |
| <i>Six6os1</i>                        | 2.33E-08 | 8.0         |          |                   | NM_029444          |
| <i>Ugt8a</i>                          | 1.08E-06 | 7.7         |          |                   | NM_011674          |
| <i>D6Mm5e</i>                         | 5.98E-08 | 7.6         |          | ✓                 | NM_033079          |
| <i>EG245516</i>                       | 1.58E-06 | 7.5         |          |                   | XM_994395          |
| <i>Gatm</i>                           | 1.10E-08 | 7.0         |          |                   | NM_025961          |
| <i>EG622311</i>                       | 1.89E-07 | 6.7         |          |                   | XM_886739          |
| <i>Spata22</i>                        | 4.91E-06 | 6.5         |          | ✓                 | NM_001045531       |
| <i>Syce1</i>                          | 8.50E-08 | 6.4         | ✓        |                   | NM_001143765       |
| <i>Dazl</i>                           | 2.46E-07 | 5.9         |          | ✓                 | NM_010021          |
| <i>Fbxo47</i>                         | 3.26E-07 | 5.8         |          |                   | NM_001081435       |
| <i>Taf7l</i>                          | 1.06E-07 | 5.7         |          | ✓                 | NM_028958          |
| <i>OTTMUSG00000015829<sup>#</sup></i> | 3.11E-07 | 5.7         |          |                   | NM_001114677       |
| <i>Mov10l1</i>                        | 1.13E-09 | 5.6         |          | ✓                 | NM_031260          |
| <i>H2-K1</i>                          | 2.29E-09 | 5.4         |          |                   | NM_001001892       |
| <i>Hsf2bp</i>                         | 1.44E-07 | 5.3         |          |                   | ENSMUST00000002145 |
| <i>A530057A03Rik</i>                  | 2.52E-06 | 5.3         |          |                   | NM_001081089       |
| <i>Tex16</i>                          | 8.55E-07 | 5.3         |          | ✓                 | NM_031382          |
| <i>Boll</i>                           | 1.18E-08 | 5.3         |          | ✓                 | NM_029267          |
| <i>Tkt11</i>                          | 2.42E-08 | 5.3         |          | ✓                 | NM_031379          |
| <i>Thbs2</i>                          | 3.69E-08 | 5.2         |          |                   | NM_011581          |
| <i>Tex14</i>                          | 3.45E-08 | 5.2         |          | ✓                 | NM_031386          |
| <i>Ccnb1ip1</i>                       | 1.45E-07 | 5.2         |          |                   | NM_001111119       |
| <i>Gstm6</i>                          | 5.70E-09 | 5.1         |          |                   | NM_008184          |
| <i>Dmcl</i>                           | 3.11E-09 | 5.1         | ✓        |                   | NM_010059          |
| <i>Cpa3</i>                           | 8.10E-05 | 5.1         |          |                   | NM_007753          |

|                             |          |     |   |   |                    |
|-----------------------------|----------|-----|---|---|--------------------|
| <i>Tcf15</i>                | 2.18E-06 | 5.0 |   | ✓ | NM_178254          |
| <i>Ccdc79</i>               | 2.38E-07 | 5.0 |   | ✓ | NM_180958          |
| <i>EG212753</i>             | 3.48E-06 | 5.0 |   |   | ENSMUST00000056225 |
| <i>Hist1h2aa</i>            | 1.02E-07 | 5.0 |   |   | NM_175658          |
| <i>Xlr</i>                  | 2.40E-04 | 4.8 | ✓ |   | NM_011725          |
| <i>Dock3</i>                | 7.74E-08 | 4.8 |   |   | NM_153413          |
| <i>Stag3</i>                | 7.87E-08 | 4.8 | ✓ |   | NM_016964          |
| <i>Tex13</i>                | 1.75E-07 | 4.8 |   | ✓ | NM_031381          |
| <i>Mtap7d2</i>              | 9.01E-07 | 4.7 |   |   | NM_001081124       |
| <i>Aldh1a1</i>              | 6.23E-09 | 4.5 |   | ✓ | NM_013467          |
| <i>Adad1</i>                | 7.72E-09 | 4.4 |   | ✓ | NM_009350          |
| <i>Dmrtc1c<sup>#</sup></i>  | 2.25E-06 | 4.4 |   | ✓ | NM_001142691       |
| <i>1700011F14Rik</i>        | 1.51E-06 | 4.4 |   |   | NM_029372          |
| <i>Hormad2</i>              | 2.75E-08 | 4.2 | ✓ |   | NM_029458          |
| <i>Tex101</i>               | 5.69E-06 | 4.2 |   | ✓ | NM_019981          |
| <i>AI481877</i>             | 1.59E-07 | 4.1 |   | ✓ | ENSMUST00000107547 |
| <i>Spo11</i>                | 2.69E-06 | 4.1 | ✓ |   | NM_012046          |
| <i>Sohlh2</i>               | 1.24E-06 | 4.1 |   | ✓ | NM_028937          |
| <i>Ddx4</i>                 | 1.66E-06 | 4.0 |   | ✓ | NM_001145885       |
| <i>Lgr5</i>                 | 1.28E-08 | 4.0 |   |   | NM_010195          |
| <i>Cpeb1</i>                | 8.91E-08 | 4.0 |   |   | NM_007755          |
| <i>Scml2</i>                | 7.81E-08 | 4.0 |   |   | NM_133194          |
| <i>Wfdc6a</i>               | 5.64E-06 | 3.9 |   |   | NM_001033240       |
| <i>CN716893<sup>#</sup></i> | 9.87E-09 | 3.8 |   |   | NM_001033492       |
| <i>Tc2n</i>                 | 3.34E-05 | 3.8 |   |   | NM_028924          |
| <i>Tuba3a</i>               | 1.82E-06 | 3.8 |   | ✓ | NM_009446          |
| <i>Nfix</i>                 | 5.42E-07 | 3.8 |   |   | NM_001081981       |
| <i>Cntd1</i>                | 1.06E-08 | 3.7 |   |   | NM_026562          |
| <i>Pramel3<sup>#</sup></i>  | 3.97E-07 | 3.6 |   | ✓ | NM_031390          |
| <i>Slc26a7</i>              | 1.23E-06 | 3.6 |   |   | NM_145947          |
| <i>Dmrtc2</i>               | 5.23E-06 | 3.6 | ✓ |   | NM_027732          |
| <i>Rnf17</i>                | 4.43E-07 | 3.6 |   | ✓ | NM_001033043       |
| <i>Rbm46</i>                | 4.51E-08 | 3.5 |   |   | NM_001146328       |
| <i>Clu</i>                  | 2.01E-09 | 3.5 |   |   | NM_013492          |
| <i>Tex15</i>                | 2.44E-09 | 3.5 | ✓ |   | NM_031374          |
| <i>Adamts19</i>             | 7.44E-06 | 3.5 |   |   | NM_175506          |
| <i>BC022960</i>             | 4.18E-07 | 3.5 |   |   | ENSMUST00000052299 |
| <i>Cldn13</i>               | 1.11E-04 | 3.5 |   |   | NM_020504          |
| <i>Tmem56</i>               | 3.54E-06 | 3.5 |   |   | NM_178936          |
| <i>Fmr1nb</i>               | 1.76E-08 | 3.5 |   |   | NM_174993          |
| <i>EG331529<sup>#</sup></i> | 1.32E-06 | 3.4 |   |   | NM_183320          |
| <i>Zcwpw1</i>               | 8.32E-08 | 3.4 |   |   | NM_001005426       |
| <i>Rbm44</i>                | 5.48E-08 | 3.4 |   |   | NM_001033408       |
| <i>Hspa4l</i>               | 1.32E-09 | 3.4 |   |   | NM_011020          |
| <i>LOC100044448</i>         | 4.77E-06 | 3.3 |   |   | XM_001472280       |
| <i>Taf4b</i>                | 2.27E-06 | 3.3 |   |   | NM_001100449       |
| <i>Lonrf2</i>               | 3.19E-08 | 3.3 |   |   | NM_001029878       |
| <i>Slc27a2</i>              | 2.64E-06 | 3.3 |   |   | NM_011978          |

|                            |          |     |   |   |                    |
|----------------------------|----------|-----|---|---|--------------------|
| <i>Sorbs2</i>              | 2.30E-05 | 3.3 |   |   | NM_172752          |
| <i>Brdt</i>                | 3.07E-06 | 3.2 |   | ✓ | NM_054054          |
| <i>Itih5</i>               | 1.62E-06 | 3.2 |   |   | NM_172471          |
| <i>AV320801</i>            | 7.19E-07 | 3.2 |   |   | NM_177918          |
| <i>Gng13</i>               | 3.13E-08 | 3.1 |   |   | NM_022422          |
| <i>Trpc1</i>               | 1.01E-07 | 3.1 |   |   | NM_011643          |
| <i>Tex18</i>               | 2.95E-07 | 3.1 |   | ✓ | AF285583           |
| <i>Cst12</i>               | 5.73E-06 | 3.1 |   | ✓ | AF440737           |
| <i>Fam55b</i>              | 1.56E-07 | 3.1 |   |   | NM_030069          |
| <i>Pld5</i>                | 3.78E-07 | 3.0 |   |   | NM_176916          |
| <i>Gypa</i>                | 1.41E-04 | 3.0 |   |   | NM_010369          |
| <i>Atf7ip2<sup>#</sup></i> | 2.68E-06 | 3.0 |   |   | NM_153123          |
| <i>Tdrd7</i>               | 2.57E-07 | 3.0 |   |   | NM_146142          |
| <i>4930485B16Rik</i>       | 4.28E-05 | 3.0 |   |   | ENSMUST00000067705 |
| <i>Penk</i>                | 1.69E-04 | 3.0 |   |   | NM_001002927       |
| <i>8030474K03Rik</i>       | 2.20E-05 | 3.0 |   |   | ENSMUST00000050654 |
| <i>1700018B24Rik</i>       | 4.85E-05 | 2.9 |   |   | NR_003617          |
| <i>Syn2</i>                | 2.16E-06 | 2.9 |   |   | NM_001111015       |
| <i>Asz1</i>                | 4.06E-05 | 2.9 |   | ✓ | NM_023729          |
| <i>Mgp</i>                 | 2.16E-06 | 2.9 |   |   | NM_008597          |
| <i>Rundc3b</i>             | 1.02E-07 | 2.8 |   |   | NM_198620          |
| <i>1700123I01Rik</i>       | 3.75E-05 | 2.8 |   |   | ENSMUST00000025699 |
| <i>Oit<sup>#</sup></i>     | 7.53E-04 | 2.8 |   |   | NM_011022          |
| <i>Prdm9</i>               | 1.71E-07 | 2.8 | ✓ |   | NM_144809          |
| <i>Rasd2</i>               | 1.11E-06 | 2.8 |   |   | NM_029182          |
| <i>Pklr</i>                | 1.47E-07 | 2.8 |   |   | NM_013631          |
| <i>Hbb-b1<sup>#</sup></i>  | 8.89E-07 | 2.8 |   |   | ENSMUST00000023934 |
| <i>Lum</i>                 | 2.73E-03 | 2.8 |   |   | NM_008524          |
| <i>Piwil2</i>              | 4.08E-07 | 2.7 |   |   | NM_021308          |
| <i>Tdrkh</i>               | 7.63E-06 | 2.7 |   |   | NM_028307          |
| <i>Fkbp6</i>               | 2.19E-06 | 2.7 |   | ✓ | NM_033571          |
| <i>Gm773</i>               | 2.89E-07 | 2.7 |   |   | NM_001033423       |
| <i>Usp26</i>               | 1.83E-04 | 2.7 |   | ✓ | NM_031388          |
| <i>Lonrf3</i>              | 2.54E-06 | 2.7 |   |   | NM_028894          |
| <i>Als2cr11</i>            | 5.77E-06 | 2.7 |   |   | NM_175200          |
| <i>Mtl5</i>                | 9.13E-07 | 2.7 |   | ✓ | NM_001039657       |
| <i>Larp2</i>               | 1.32E-06 | 2.7 |   |   | NM_001040399       |
| <i>Cited1</i>              | 4.34E-06 | 2.7 |   |   | NM_007709          |
| <i>Setdb2</i>              | 2.94E-07 | 2.7 |   |   | NM_001081024       |
| <i>Xlr3b</i>               | 9.22E-07 | 2.7 |   |   | NM_001081643       |
| <i>OTTMUSG00000005773</i>  | 1.65E-05 | 2.6 |   |   | XM_356549          |
| <i>Phf16</i>               | 3.29E-07 | 2.6 |   |   | NM_199317          |
| <i>Cyct</i>                | 4.10E-06 | 2.6 |   |   | NM_009989          |
| <i>4930420K17Rik</i>       | 4.10E-08 | 2.6 |   |   | NM_001081029       |
| <i>Phyhipl</i>             | 2.27E-06 | 2.6 |   |   | NM_178621          |
| <i>Tuba3b</i>              | 9.63E-05 | 2.6 |   | ✓ | NM_009449          |
| <i>Zcwpw2</i>              | 1.21E-08 | 2.6 |   |   | BC104378           |
| <i>Pasd1</i>               | 5.42E-05 | 2.6 |   |   | BC147557           |

|                      |          |     |  |   |                    |
|----------------------|----------|-----|--|---|--------------------|
| <i>Tdrd1</i>         | 2.39E-07 | 2.6 |  | ✓ | NM_001002238       |
| <i>1700001L05Rik</i> | 5.39E-07 | 2.6 |  |   | ENSMUST00000100370 |
| <i>Zfp667</i>        | 7.46E-07 | 2.6 |  |   | NM_001024928       |
| <i>Xlr3c</i>         | 3.11E-07 | 2.6 |  |   | NM_011727          |
| <i>2210023G05Rik</i> | 1.04E-06 | 2.6 |  |   | BC027185           |
| <i>Phf19</i>         | 5.20E-06 | 2.5 |  |   | NM_028716          |
| <i>Aldh1a7</i>       | 1.15E-06 | 2.5 |  |   | NM_011921          |
| <i>Fam40b</i>        | 6.33E-06 | 2.5 |  |   | NM_177204          |
| <i>Luzp4</i>         | 1.01E-03 | 2.5 |  |   | NM_001114383       |
| <i>Pdha1</i>         | 1.07E-05 | 2.5 |  |   | NM_008810          |
| <i>Col6a2</i>        | 1.64E-06 | 2.5 |  |   | NM_146007          |
| <i>Dnajc5g</i>       | 1.11E-04 | 2.5 |  |   | NM_177677          |
| <i>Ltbp4</i>         | 1.38E-06 | 2.5 |  |   | NM_175641          |
| <i>Spata5</i>        | 8.93E-08 | 2.5 |  |   | NM_021343          |
| <i>Adamts16</i>      | 1.14E-07 | 2.5 |  |   | NM_172053          |
| <i>Eln</i>           | 1.75E-08 | 2.5 |  |   | NM_007925          |
| <i>Ccdc73</i>        | 5.34E-08 | 2.5 |  |   | NM_177600          |
| <i>Fhl4</i>          | 1.61E-05 | 2.5 |  |   | NM_010214          |
| <i>Inca1</i>         | 2.62E-06 | 2.5 |  |   | NM_213729          |
| <i>Slc22a21</i>      | 5.66E-05 | 2.5 |  |   | NM_019723          |
| <i>3830403N18Rik</i> | 1.20E-06 | 2.4 |  |   | NM_027510          |
| <i>Ly6d</i>          | 1.51E-07 | 2.4 |  |   | NM_010742          |
| <i>1700029F09Rik</i> | 1.47E-06 | 2.4 |  |   | NM_029368          |
| <i>Sox30</i>         | 1.15E-05 | 2.4 |  |   | NM_173384          |
| <i>Hccs</i>          | 5.86E-07 | 2.4 |  |   | NM_008222          |
| <i>Pcp4l1</i>        | 2.15E-04 | 2.4 |  |   | NM_025557          |
| <i>C77370</i>        | 3.01E-06 | 2.4 |  |   | DQ975302           |
| <i>Enpp2</i>         | 4.54E-05 | 2.4 |  |   | NM_015744          |
| <i>Lox</i>           | 1.55E-04 | 2.4 |  |   | NM_010728          |
| <i>Btbd10</i>        | 2.18E-07 | 2.4 |  |   | NM_133700          |
| <i>Cyp2r1</i>        | 3.02E-06 | 2.4 |  |   | NM_177382          |
| <i>Hist1h2ba</i>     | 1.45E-04 | 2.4 |  | ✓ | NM_175663          |
| <i>Ccnb3</i>         | 2.92E-03 | 2.4 |  |   | NM_183015          |
| <i>Cubn</i>          | 8.60E-06 | 2.4 |  |   | NM_001081084       |
| <i>Caprin2</i>       | 1.76E-07 | 2.4 |  |   | NM_181541          |
| <i>Rel</i>           | 1.15E-06 | 2.4 |  |   | NM_009044          |
| <i>Zdhhc23</i>       | 7.16E-06 | 2.4 |  |   | NM_001007460       |
| <i>Wdr44</i>         | 1.15E-07 | 2.4 |  |   | NM_175180          |
| <i>Myh7</i>          | 1.07E-04 | 2.3 |  |   | NM_080728          |
| <i>Atr</i>           | 8.26E-08 | 2.3 |  |   | NM_019864          |
| <i>Hsd3b1</i>        | 1.80E-03 | 2.3 |  |   | NM_008293          |
| <i>Magi2</i>         | 1.23E-06 | 2.3 |  |   | NM_015823          |
| <i>Casp12</i>        | 7.35E-06 | 2.3 |  |   | NM_009808          |
| <i>Xlr3a</i>         | 1.03E-06 | 2.3 |  |   | NM_001110784       |
| <i>Map3k5</i>        | 8.73E-06 | 2.3 |  |   | NM_008580          |
| <i>4930486G11Rik</i> | 1.46E-04 | 2.3 |  |   | NM_175213          |
| <i>Col6a1</i>        | 1.90E-07 | 2.3 |  |   | NM_009933          |
| <i>Car2</i>          | 1.15E-04 | 2.3 |  |   | NM_009801          |

|                                  |          |     |   |   |              |
|----------------------------------|----------|-----|---|---|--------------|
| <i>Psmg8</i>                     | 2.16E-05 | 2.3 |   |   | BC116990     |
| <i>Cntn4</i>                     | 1.15E-05 | 2.3 |   |   | NM_001109749 |
| <i>Gm1968</i>                    | 8.20E-06 | 2.3 |   |   | NM_001033403 |
| <i>Trappc2</i>                   | 6.38E-07 | 2.3 |   |   | NM_025432    |
| <i>Stom</i>                      | 8.30E-06 | 2.3 |   |   | NM_013515    |
| <i>Pcgf5</i>                     | 2.31E-06 | 2.3 |   |   | NM_029508    |
| <i>Esco2</i>                     | 5.73E-07 | 2.3 |   |   | NM_028039    |
| <i>AU022751</i>                  | 3.00E-06 | 2.3 |   |   | BC100377     |
| <i>4932438A13Rik<sup>#</sup></i> | 2.12E-08 | 2.3 |   |   | NM_172679    |
| <i>Rhox2a</i>                    | 6.62E-06 | 2.3 |   |   | NM_029203    |
| <i>BC051142</i>                  | 1.13E-05 | 2.3 |   |   | NM_001001177 |
| <i>A130049A11Rik</i>             | 3.58E-06 | 2.3 |   |   | AK048683     |
| <i>Ogn</i>                       | 5.98E-05 | 2.3 |   |   | NM_008760    |
| <i>Asf1b</i>                     | 2.08E-08 | 2.2 |   |   | NM_024184    |
| <i>Ppp4r4</i>                    | 3.24E-06 | 2.2 |   |   | NM_028980    |
| <i>2310061I04Rik</i>             | 5.78E-07 | 2.2 |   |   | NM_001033630 |
| <i>Angptl7</i>                   | 5.49E-06 | 2.2 |   |   | NM_001039554 |
| <i>Kcnb2</i>                     | 1.89E-06 | 2.2 |   |   | NM_001098528 |
| <i>Rhox2e</i>                    | 1.47E-05 | 2.2 |   |   | NM_001085348 |
| <i>Myh8</i>                      | 2.88E-05 | 2.  |   |   | NM_177369    |
| <i>Ofd1</i>                      | 2.62E-06 | 2.2 |   |   | NM_177429    |
| <i>Mybl1</i>                     | 4.64E-07 | 2.2 |   |   | NM_008651    |
| <i>Msh4</i>                      | 1.12E-05 | 2.2 |   | ✓ | NM_031870    |
| <i>Taf9b</i>                     | 5.52E-05 | 2.2 |   |   | NM_001001176 |
| <i>Adamts2</i>                   | 3.19E-07 | 2.2 |   |   | NM_175643    |
| <i>Pramell1</i>                  | 6.22E-05 | 2.2 |   |   | NM_031377    |
| <i>Hmcn1</i>                     | 1.89E-04 | 2.2 |   |   | NM_001024720 |
| <i>Glp1</i>                      | 5.76E-05 | 2.2 |   |   | NM_001103168 |
| <i>Zfp541</i>                    | 4.18E-06 | 2.2 |   | ✓ | NM_001099277 |
| <i>Slc40a1</i>                   | 1.16E-05 | 2.2 |   |   | NM_016917    |
| <i>Cd44</i>                      | 1.12E-06 | 2.2 |   |   | NM_009851    |
| <i>Kcng3</i>                     | 1.49E-07 | 2.2 |   |   | NM_153512    |
| <i>Acer3</i>                     | 3.74E-06 | 2.2 |   |   | NM_025408    |
| <i>Mei1</i>                      | 3.68E-04 | 2.2 | ✓ |   | AY270177     |
| <i>Cyld</i>                      | 6.14E-07 | 2.1 |   |   | NM_001128169 |
| <i>4930432K21Rik</i>             | 1.31E-05 | 2.1 |   |   | BC075658     |
| <i>Dennd2c</i>                   | 6.38E-07 | 2.1 |   |   | NM_177857    |
| <i>Rec8</i>                      | 3.99E-07 | 2.1 | ✓ |   | NM_020002    |
| <i>Lrrn1</i>                     | 4.75E-05 | 2.1 |   |   | NM_008516    |
| <i>Lama3</i>                     | 2.99E-06 | 2.1 |   |   | NM_010680    |
| <i>Prelp</i>                     | 2.74E-05 | 2.1 |   |   | NM_054077    |
| <i>Srpx2</i>                     | 5.16E-07 | 2.1 |   |   | NM_026838    |
| <i>Lba1</i>                      | 4.05E-05 | 2.1 |   |   | BC086653     |
| <i>Enpp1</i>                     | 3.07E-04 | 2.1 |   |   | NM_008813    |
| <i>Clstn2</i>                    | 2.21E-04 | 2.1 |   |   | NM_022319    |
| <i>OTTMUSG00000019138</i>        | 3.63E-03 | 2.1 |   |   | NM_001037716 |
| <i>Abca2</i>                     | 1.43E-07 | 2.1 |   |   | NM_007379    |
| <i>Rnls</i>                      | 8.77E-07 | 2.1 |   |   | NM_001146342 |

|                  |          |     |  |  |                    |
|------------------|----------|-----|--|--|--------------------|
| <i>Cyp2f2</i>    | 7.44E-05 | 2.1 |  |  | NM_007817          |
| <i>Hells</i>     | 5.98E-07 | 2.1 |  |  | NM_008234          |
| <i>Tdrd5</i>     | 6.74E-06 | 2.1 |  |  | NM_001134741       |
| <i>Nr3c1</i>     | 8.45E-07 | 2.1 |  |  | NM_008173          |
| <i>Kazald1</i>   | 3.58E-05 | 2.1 |  |  | NM_178929          |
| <i>D9Ert402e</i> | 8.60E-05 | 2.1 |  |  | BC080690           |
| <i>Lrig1</i>     | 7.61E-09 | 2.1 |  |  | NM_008377          |
| <i>Adam22</i>    | 9.36E-06 | 2.1 |  |  | NM_001007220       |
| <i>Emilin3</i>   | 2.81E-09 | 2.1 |  |  | NM_182840          |
| <i>Aspn</i>      | 9.33E-04 | 2.1 |  |  | NM_025711          |
| <i>Dcn</i>       | 1.19E-04 | 2.1 |  |  | NM_007833          |
| <i>Crebl2</i>    | 2.22E-06 | 2.1 |  |  | NM_177687          |
| <i>Tspan33</i>   | 7.03E-06 | 2.1 |  |  | NM_146173          |
| <i>Mro</i>       | 5.44E-07 | 2.0 |  |  | NM_027741          |
| <i>Fam129a</i>   | 2.20E-06 | 2.0 |  |  | NM_022018          |
| <i>Cst8</i>      | 2.98E-05 | 2.0 |  |  | NM_009978          |
| <i>Ankrd29</i>   | 1.59E-04 | 2.0 |  |  | ENSMUST00000118525 |
| <i>Cpne5</i>     | 1.20E-06 | 2.0 |  |  | NM_153166          |
| <i>Tfrc</i>      | 1.19E-05 | 2.0 |  |  | NM_011638          |
| <i>Lypd4</i>     | 1.56E-04 | 2.0 |  |  | NM_182785          |
| <i>Cldn1</i>     | 8.75E-05 | 2.0 |  |  | NM_016674          |
| <i>Scaper</i>    | 3.10E-06 | 2.0 |  |  | NM_001081341       |
| <i>Nkd2</i>      | 8.65E-07 | 2.0 |  |  | NM_028186          |
| <i>Ppp2r2c</i>   | 2.41E-04 | 2.0 |  |  | NM_172994          |
| <i>Cpeb2</i>     | 3.13E-07 | 2.0 |  |  | NM_175937          |
| <i>Glr3</i>      | 9.35E-07 | 2.0 |  |  | NM_010298          |
| <i>Ano1</i>      | 7.25E-05 | 2.0 |  |  | NM_178642          |
| <i>Cpeb3</i>     | 7.19E-07 | 2.0 |  |  | NM_198300          |
| <i>Rhd</i>       | 2.07E-04 | 2.0 |  |  | NM_011270          |

# denotes the genes with more than one probe, \* denotes genes with known meiotic function, \*\* denotes genes with known function in germ cell development or enriched in gonadal tissue.

**Supplemental Table S2.** Fold change for genes whose expression was significantly altered by BPA.

| <b>Day/up- or<br/>down-regulated</b> | <b>Fold Change</b> |                 |             | <b>Total</b> |
|--------------------------------------|--------------------|-----------------|-------------|--------------|
|                                      | <b>1.0-1.29</b>    | <b>1.3-1.59</b> | <b>1.6+</b> |              |
| 12 up                                | 589                | 26              | 2           | 617          |
| 12 down                              | 632                | 48              | 1           | 681          |
| 12.5 up                              | 815                | 47              | 2           | 864          |
| 12.5 down                            | 713                | 87              | 8           | 808          |
| 13.5 up                              | 919                | 28              | 2           | 949          |
| 13.5 down                            | 557                | 48              | 7           | 612          |
| 14.5 up                              | 1302               | 123             | 5           | 1430         |
| 14.5 down                            | 1167               | 59              | 5           | 1231         |

**Supplemental Table S3.** Genes showing significantly altered expression at 3 or more successive time points.

|                       | Gene Symbol      | GenBank ID   | 12 dpc   |       | 12.5 dpc |       | 13.5 dpc |       |
|-----------------------|------------------|--------------|----------|-------|----------|-------|----------|-------|
|                       |                  |              | p-value  | FC    | p-value  | FC    | p-value  | FC    |
| <i>Up regulated</i>   | <i>Pebp1</i>     | NM_018858    | 0.0282   | 1.04  | 0.0414   | 1.04  | 0.0044   | 1.06  |
|                       | <i>Rad51l3</i>   | NM_011235    | 0.0008   | 1.16  | 0.0188   | 1.10  | 0.0208   | 1.10  |
|                       | <i>Trim27</i>    | NM_009054    | 0.0102   | 1.08  | 0.0112   | 1.08  | 0.0065   | 1.09  |
|                       | <i>Tmem180</i>   | NM_029186    | 0.0497   | 1.09  | 0.0012   | 1.16  | 0.0003   | 1.20  |
|                       | <i>Rbm14</i>     | NM_019869    | 0.0301   | 1.06  | 0.0014   | 1.10  | 0.0371   | 1.06  |
|                       | <i>Fpgs</i>      | NM_010236    | 0.0128   | 1.18  | 0.0340   | 1.15  | 0.0279   | 1.15  |
|                       | <i>Adad1</i>     | NM_009350    | 0.0041   | 1.21  | 0.0069   | 1.20  | 0.0077   | 1.19  |
|                       | <i>Gnb1</i>      | NM_008142    | 0.0217   | 1.03  | 0.0004   | 1.05  | 0.0442   | 1.02  |
|                       | <i>Yif1b</i>     | NM_029887    | 0.0202   | 1.09  | 0.0003   | 1.16  | 0.0034   | 1.12  |
|                       | <i>Emd</i>       | NM_007927    | 0.0284   | 1.13  | 0.0221   | 1.13  | 0.0254   | 1.13  |
| <i>Down regulated</i> | <i>EG433168</i>  | XR_031234    | 0.0088   | -1.32 | 0.0061   | -1.34 | 0.0293   | -1.25 |
|                       | <i>Fam101a</i>   | BC053444     | 0.0310   | -1.10 | 0.0315   | -1.10 | 0.0463   | -1.09 |
|                       | <i>Hs3st1</i>    | NM_010474    | 0.0091   | -1.16 | 0.0433   | -1.12 | 0.0164   | -1.15 |
|                       | <i>Fam70b</i>    | NM_001143671 | 0.0202   | -1.16 | 0.0127   | -1.17 | 0.0268   | -1.15 |
|                       | <i>Ucp1</i>      | NM_009463    | 0.0079   | -1.13 | 0.0239   | -1.10 | 0.0231   | -1.11 |
|                       | Gene Symbol      | GenBank ID   | 12.5 dpc |       | 13.5 dpc |       | 14.5 dpc |       |
|                       |                  |              | p-value  | FC    | p-value  | FC    | p-value  | FC    |
| <i>Up regulated</i>   | <i>Plekhh3</i>   | NM_146030    | 0.0357   | 1.12  | 0.0394   | 1.12  | 0.0137   | 1.15  |
|                       | <i>Dom3z</i>     | NM_033613    | 0.0207   | 1.10  | 0.0041   | 1.13  | 0.0046   | 1.13  |
|                       | <i>Atp5e</i>     | NM_025983    | 0.0011   | 1.10  | 0.0031   | 1.08  | 0.0044   | 1.08  |
|                       | <i>Zfp687</i>    | NM_030074    | 0.0237   | 1.10  | 0.0465   | 1.08  | 0.0231   | 1.10  |
|                       | <i>100038993</i> | NM_001100596 | 0.0316   | 1.10  | 0.0202   | 1.10  | 0.0111   | 1.12  |
|                       | <i>Zfp593</i>    | NM_024215    | 0.0477   | 1.07  | 0.0007   | 1.14  | 0.0310   | 1.08  |
|                       | <i>Cox6a1</i>    | NM_007748    | 0.0453   | 1.09  | 0.0089   | 1.13  | 0.0005   | 1.19  |
|                       | <i>Tect1</i>     | NM_001039153 | 0.0048   | 1.12  | 0.0275   | 1.09  | 0.0271   | 1.09  |
|                       | <i>Zfp428</i>    | NM_146183    | 0.0053   | 1.12  | 0.0284   | 1.09  | 0.0259   | 1.09  |
|                       | <i>Yif1b</i>     | NM_029887    | 0.0003   | 1.16  | 0.0034   | 1.12  | 0.0018   | 1.13  |
|                       | <i>Neu3</i>      | NM_016720    | 0.0276   | 1.12  | 0.0113   | 1.14  | 0.0248   | 1.12  |
|                       | <i>Mrpl4</i>     | NM_023167    | 0.0008   | 1.12  | 0.0007   | 1.12  | 0.0263   | 1.07  |
|                       | <i>Timm17b</i>   | NM_011591    | 0.0153   | 1.09  | 0.0018   | 1.13  | 0.0007   | 1.14  |
| <i>Down regulated</i> | <i>BC016579</i>  | NM_145389    | 0.0007   | -1.16 | 0.0417   | -1.08 | 0.0212   | -1.09 |
|                       | <i>Nxf1</i>      | NM_016813    | 0.0209   | -1.07 | 0.0002   | -1.13 | 0.0047   | -1.09 |



**Supplemental Table S4.** Genes from Supplemental Table 1 whose expression was significantly altered by BPA.

| <b>12 dpc</b>    |                           |                   |                |           |
|------------------|---------------------------|-------------------|----------------|-----------|
|                  | <b>Gene Symbol</b>        | <b>GenBank ID</b> | <b>p-value</b> | <b>FC</b> |
| <i>Up</i>        | <i>Wfdc6a</i>             | NM_001033240      | 3.89E-02       | 1.33      |
| <i>regulated</i> | <i>A130049A11Rik</i>      | AK048683          | 2.51E-02       | 1.30      |
| <i>Down</i>      | <i>Enpp1</i>              | NM_008813         | 1.92E-02       | -1.21     |
| <i>regulated</i> | <i>Atf7ip2</i>            | NM_153123         | 2.50E-02       | -1.42     |
|                  | <i>Rnls</i>               | NM_001146342      | 2.32E-02       | -1.19     |
|                  | <i>Angptl7</i>            | NM_001039554      | 4.07E-02       | -1.31     |
|                  | <i>4930420K17Rik</i>      | NM_001081029      | 3.65E-02       | -1.15     |
|                  | <i>Xlr</i>                | NM_011725         | 1.01E-02       | -1.61     |
|                  | <i>Prelp</i>              | NM_054077         | 3.00E-02       | -1.19     |
| <b>12.5 dpc</b>  |                           |                   |                |           |
|                  | <b>Gene Symbol</b>        | <b>GenBank ID</b> | <b>p-value</b> | <b>FC</b> |
| <i>Up</i>        | <i>Stom</i>               | NM_013515         | 3.64E-03       | 1.26      |
| <i>regulated</i> | <i>Penk</i>               | NM_001002927      | 3.67E-02       | 1.54      |
|                  | <i>4930420K17Rik</i>      | NM_001081029      | 6.08E-03       | 1.22      |
|                  | <i>Tex12</i>              | NM_025687         | 2.09E-02       | 1.40      |
| <i>Down</i>      | <i>Tdrd7</i>              | NM_146142         | 4.10E-02       | -1.17     |
| <i>regulated</i> |                           |                   |                |           |
| <b>13.5 dpc</b>  |                           |                   |                |           |
|                  | <b>Gene Symbol</b>        | <b>GenBank ID</b> | <b>p-value</b> | <b>FC</b> |
| <i>Up</i>        | none                      |                   |                |           |
| <i>regulated</i> |                           |                   |                |           |
| <i>Down</i>      | <i>Dcn</i>                | NM_007833         | 4.04E-02       | -1.30     |
| <i>regulated</i> | <i>Lum</i>                | NM_008524         | 2.27E-02       | -1.53     |
|                  | <i>Ogn</i>                | NM_008760         | 2.92E-02       | -1.53     |
|                  | <i>Nr3c1</i>              | NM_008173         | 3.83E-02       | -1.16     |
|                  | <i>Cpa3</i>               | NM_007753         | 3.01E-02       | -1.44     |
|                  | <i>Ugt8a</i>              | NM_011674         | 3.15E-02       | -1.37     |
|                  | <i>Cyld</i>               | NM_001128169      | 4.79E-02       | -1.15     |
|                  | <i>C77370</i>             | DQ975302          | 3.81E-02       | -1.18     |
| <b>14.5 dpc</b>  |                           |                   |                |           |
|                  | <b>Gene Symbol</b>        | <b>GenBank ID</b> | <b>p-value</b> | <b>FC</b> |
| <i>Up</i>        | <i>Mybl1</i>              | NM_008651         | 1.52E-02       | 1.21      |
| <i>regulated</i> | <i>Fhl4</i>               | NM_010214         | 1.14E-02       | 1.27      |
|                  | <i>OTTMUSG00000005773</i> | XM_356549         | 6.15E-04       | 1.57      |
|                  | <i>Slc22a21</i>           | NM_019723         | 2.74E-02       | 1.20      |

|                  |                           |                    |          |       |
|------------------|---------------------------|--------------------|----------|-------|
|                  | <i>Hist1h2aa</i>          | NM_175658          | 1.14E-03 | 1.67  |
|                  | <i>Hist1h2ba</i>          | NM_175663          | 3.90E-03 | 1.56  |
|                  | <i>Ly6d</i>               | NM_010742          | 3.51E-02 | 1.28  |
|                  | <i>Dmc1</i>               | NM_010059          | 8.15E-03 | 1.35  |
|                  | <i>1700001L05Rik</i>      | ENSMUST00000100370 | 9.05E-03 | 1.22  |
|                  | <i>BC051142</i>           | NM_001001177       | 3.60E-02 | 1.42  |
|                  | <i>Hsf2bp</i>             | ENSMUST00000002145 | 3.61E-02 | 1.31  |
|                  | <i>Mtl5</i>               | NM_001039657       | 1.10E-02 | 1.50  |
|                  | <i>Rnls</i>               | NM_001146342       | 1.13E-03 | 1.31  |
|                  | <i>A530057A03Rik</i>      | NM_001081089       | 9.81E-03 | 1.41  |
|                  | <i>Sycp2</i>              | NM_177191          | 6.78E-03 | 1.44  |
|                  | <i>1700018B24Rik</i>      | NR_003617          | 2.89E-02 | 1.31  |
|                  | <i>Msh4</i>               | NM_031870          | 2.94E-02 | 1.21  |
|                  | <i>AI481877</i>           | ENSMUST00000107547 | 1.69E-02 | 1.51  |
|                  | <i>Zcwpw1</i>             | NM_001005426       | 1.55E-02 | 1.21  |
|                  | <i>Eln</i>                | NM_007925          | 6.56E-03 | 1.23  |
|                  | <i>Fam40b</i>             | NM_177204          | 4.63E-02 | 1.27  |
|                  | <i>D6Mm5e</i>             | NM_033079          | 1.39E-02 | 1.42  |
|                  | <i>Syn2</i>               | NM_001111015       | 3.59E-03 | 1.36  |
|                  | <i>Dmrtc2</i>             | NM_027732          | 1.74E-03 | 1.72  |
|                  | <i>Asf1b</i>              | NM_024184          | 3.61E-02 | 1.20  |
|                  | <i>Cyld</i>               | NM_001128169       | 2.80E-02 | 1.18  |
|                  | <i>Ccdc79</i>             | NM_180958          | 4.65E-02 | 1.49  |
|                  | <i>Dock3</i>              | NM_153413          | 3.71E-03 | 1.43  |
|                  | <i>Zcwpw2</i>             | BC104378           | 5.77E-03 | 1.52  |
|                  | <i>Fmr1nb</i>             | NM_174993          | 2.11E-02 | 1.24  |
|                  | <i>Dmrtc1c</i>            | NM_001142691       | 1.64E-02 | 1.28  |
|                  | <i>Luzp4</i>              | NM_001114383       | 4.22E-05 | 2.08  |
|                  | <i>OTTMUSG00000019138</i> | NM_001037716       | 1.01E-04 | 1.75  |
|                  | <i>Ott</i>                | NM_011022          | 2.07E-04 | 1.98  |
|                  | <i>AU022751</i>           | BC100377           | 2.87E-02 | 1.33  |
|                  | <i>1700013H16Rik</i>      | ENSMUST00000067940 | 1.10E-02 | 1.42  |
|                  | <i>Xlr4b</i>              | NM_021365          | 1.99E-02 | 1.37  |
|                  | <i>Xlr4c</i>              | NM_183094          | 3.96E-02 | 1.35  |
|                  | <i>CN716893</i>           | NM_001033492       | 1.49E-02 | 1.33  |
|                  | <i>4930486G11Rik</i>      | NM_175213          | 4.55E-02 | 1.31  |
|                  | <i>Als2cr11</i>           | NM_175200          | 4.20E-03 | 1.35  |
|                  | <i>Dnaja5g</i>            | NM_177677          | 5.74E-03 | 1.25  |
|                  | <i>Scaper</i>             | NM_001081341       | 3.15E-02 | 1.10  |
| <i>Down</i>      | <i>Tmem56</i>             | NM_178936          | 2.90E-02 | -1.59 |
| <i>regulated</i> | <i>Fam55b</i>             | NM_030069          | 1.63E-02 | -2.02 |
